# Supplementary material for: Variations in Total Phenolic, Total Flavonoid Contents, and Free Radicals’ Scavenging Potential of Onion Varieties Planted under Diverse Environmental Conditions
Source: MDPI journal article supplement (doi:10.3390/plants11070950), 2022-03-31
Supplement: s1 [file s1]

**Table S1.** Correlations of total phenolic, total flavonoid contents and antioxidant activities in onion bulbs with growing conditions

| <b>V1-B</b>                   | Max.T     | Min.T   | MT     | Rf     | RH       | SP       | D          | MWs    | MnWs   | pH      | EC        | Om       | Alt.     |
|-------------------------------|-----------|---------|--------|--------|----------|----------|------------|--------|--------|---------|-----------|----------|----------|
| TPC                           | 0.831     | .999(*) | 0.962  | -0.935 | -.999(*) | 1.000(*) | 0.937      | 0.933  | 0.946  | -0.675  | 0.816     | -0.551   | -.999(*) |
| TFC                           | 0.935     | 0.536   | 0.779  | -0.830 | -0.608   | 0.602    | 0.258      | 0.833  | 0.813  | -0.992  | 0.000     | -.999(*) | -0.608   |
| FRAP                          | 0.993     | 0.724   | 0.908  | -0.940 | -0.782   | 0.777    | 0.484      | 0.942  | 0.929  | -0.993  | 0.242     | -0.962   | -0.782   |
| PMA                           | -0.815    | -0.307  | -0.596 | 0.663  | 0.388    | -0.382   | -0.007     | -0.667 | -0.640 | 0.930   | 0.251     | 0.976    | 0.389    |
| DPPH                          | -0.338    | -0.834  | -0.613 | 0.543  | 0.783    | -0.787   | -0.961     | -0.538 | -0.568 | 0.105   | -1.000(*) | -0.052   | 0.783    |
| OH                            | -0.118    | 0.500   | 0.195  | -0.110 | -0.422   | 0.429    | 0.737      | 0.105  | 0.140  | 0.350   | 0.886     | 0.492    | -0.422   |
| H <sub>2</sub> O <sub>2</sub> | -0.995    | -0.739  | -0.917 | 0.947  | 0.795    | -0.791   | -0.503     | -0.949 | -0.937 | 0.990   | -0.264    | 0.955    | 0.795    |
| ABTS                          | 0.695     | 0.987   | 0.884  | -0.840 | -0.970   | 0.971    | 0.990      | 0.837  | 0.856  | -0.505  | 0.919     | -0.364   | -0.970   |
| <b>V2-B</b>                   | Max.T     | Min.T   | MT     | Rf     | RH       | SP       | D          | MWs    | MnWs   | pH      | EC        | Om       | Alt.     |
| TPC                           | -1.000(*) | -0.813  | -0.957 | 0.979  | 0.861    | -0.858   | -0.601     | -0.980 | -0.972 | 0.966   | -0.375    | 0.914    | 0.861    |
| TFC                           | 0.194     | 0.742   | 0.487  | -0.411 | -0.681   | 0.686    | 0.909      | 0.406  | 0.438  | 0.045   | 0.986     | 0.201    | -0.681   |
| FRAP                          | -0.628    | -0.037  | -0.357 | 0.435  | 0.124    | -0.118   | 0.264      | -0.440 | -0.408 | 0.795   | 0.504     | 0.880    | 0.124    |
| PMA                           | -.999(*)  | -0.778  | -0.939 | 0.965  | 0.830    | -0.826   | -0.553     | -0.966 | -0.956 | 0.980   | -0.320    | 0.936    | 0.830    |
| DPPH                          | 0.571     | -0.034  | 0.289  | -0.370 | -0.053   | 0.046    | -0.333     | 0.375  | 0.342  | -0.749  | -0.564    | -0.844   | -0.053   |
| OH                            | -0.869    | -0.992  | -0.979 | 0.958  | .999(*)  | -.999(*) | -0.910     | -0.957 | -0.967 | 0.726   | -0.772    | 0.610    | .999(*)  |
| H <sub>2</sub> O <sub>2</sub> | -0.419    | 0.207   | -0.118 | 0.203  | -0.121   | 0.128    | 0.491      | -0.208 | -0.173 | 0.623   | 0.699     | 0.738    | -0.121   |
| ABTS                          | 0.223     | 0.762   | 0.514  | -0.438 | -0.703   | 0.708    | 0.921      | 0.434  | 0.465  | 0.015   | 0.990     | 0.171    | -0.703   |
| <b>V3-B</b>                   | Max.T     | Min.T   | MT     | Rf     | RH       | SP       | D          | MWs    | MnWs   | pH      | EC        | Om       | Alt.     |
| TPC                           | 0.809     | 0.296   | 0.588  | -0.655 | -0.378   | 0.372    | -0.004     | 0.659  | 0.632  | -0.925  | -0.262    | -0.973   | -0.378   |
| TFC                           | 0.592     | -0.008  | 0.314  | -0.394 | -0.079   | 0.072    | -0.308     | 0.399  | 0.366  | -0.766  | -0.543    | -0.857   | -0.079   |
| FRAP                          | 0.919     | 0.972   | 0.996  | -0.984 | -0.989   | 0.988    | 0.858      | 0.983  | 0.989  | -0.798  | 0.696     | -0.695   | -0.989   |
| PMA                           | -0.584    | -0.954  | -0.807 | 0.753  | 0.924    | -0.927   | -1.000(**) | -0.75  | -0.773 | 0.375   | -0.966    | 0.225    | 0.924    |
| DPPH                          | -0.406    | -0.872  | -0.668 | 0.602  | 0.826    | -0.83    | -0.979     | -0.598 | -0.626 | 0.177   | -.999(*)  | 0.021    | 0.826    |
| OH                            | -0.951    | -0.578  | -0.809 | 0.857  | 0.647    | -0.641   | -0.306     | -0.859 | -0.841 | .997(*) | -0.051    | 0.997    | 0.647    |

|                               |         |          |        |        |            |           |        |        |        |           |          |          |            |
|-------------------------------|---------|----------|--------|--------|------------|-----------|--------|--------|--------|-----------|----------|----------|------------|
| H <sub>2</sub> O <sub>2</sub> | -0.777  | -.999(*) | -0.933 | 0.899  | 0.992      | -0.993    | -0.965 | -0.897 | -0.912 | 0.605     | -0.865   | 0.473    | 0.992      |
| ABTS                          | -0.437  | 0.188    | -0.137 | 0.221  | -0.102     | 0.109     | 0.475  | -0.227 | -0.192 | 0.638     | 0.685    | 0.75     | -0.102     |
| <b>V4-B</b>                   | Max.T   | Min.T    | MT     | Rf     | RH         | SP        | D      | MWs    | MnWs   | pH        | EC       | Om       | Alt.       |
| TPC                           | 0.977   | 0.654    | 0.862  | -0.902 | -0.717     | 0.712     | 0.396  | 0.905  | 0.889  | -1.000(*) | 0.146    | -0.984   | -0.717     |
| TFC                           | 0.159   | -0.463   | -0.154 | 0.069  | 0.384      | -0.391    | -0.708 | -0.063 | -0.099 | -0.389    | -0.866   | -0.528   | 0.384      |
| FRAP                          | 0.461   | -0.161   | 0.164  | -0.248 | 0.075      | -0.082    | -0.450 | 0.253  | 0.219  | -0.659    | -0.665   | -0.768   | 0.075      |
| PMA                           | -0.422  | -0.881   | -0.682 | 0.617  | 0.836      | -0.840    | -0.982 | -0.612 | -0.640 | 0.195     | -.997(*) | 0.039    | 0.836      |
| DPPH                          | 0.178   | -0.446   | -0.134 | 0.049  | 0.366      | -0.373    | -0.694 | -0.044 | -0.079 | -0.407    | -0.856   | -0.545   | 0.366      |
| OH                            | 0.846   | 0.997    | 0.969  | -0.945 | -1.000(**) | 1.000(**) | 0.927  | 0.943  | 0.954  | -0.695    | 0.800    | -0.574   | -1.000(**) |
| H <sub>2</sub> O <sub>2</sub> | 0.962   | 0.608    | 0.831  | -0.876 | -0.675     | 0.670     | 0.342  | 0.878  | 0.861  | -.999(*)  | 0.088    | -0.993   | -0.675     |
| ABTS                          | 0.116   | 0.687    | 0.417  | -0.338 | -0.621     | 0.626     | 0.873  | 0.333  | 0.366  | 0.124     | 0.969    | 0.277    | -0.621     |
| <b>V5-B</b>                   | Max.T   | Min.T    | MT     | Rf     | RH         | SP        | D      | MWs    | MnWs   | pH        | EC       | Om       | Alt.       |
| TPC                           | .998(*) | 0.767    | 0.933  | -0.960 | -0.820     | 0.816     | 0.539  | 0.962  | 0.951  | -0.984    | 0.304    | -0.914   | -0.820     |
| TFC                           | 0.859   | 0.381    | 0.658  | -0.720 | -0.460     | 0.454     | 0.086  | 0.724  | 0.699  | -0.954    | -0.173   | -.998(*) | -0.461     |
| FRAP                          | 0.677   | 0.102    | 0.416  | -0.493 | -0.188     | 0.182     | -0.201 | 0.497  | 0.466  | -0.83     | -0.447   | -0.938   | -0.188     |
| PMA                           | 0.789   | 0.265    | 0.561  | -0.630 | -0.348     | 0.341     | -0.037 | 0.634  | 0.606  | -0.911    | -0.293   | -0.982   | -0.348     |
| DPPH                          | .998(*) | 0.761    | 0.929  | -0.958 | -0.815     | 0.811     | 0.532  | 0.959  | 0.948  | -0.985    | 0.295    | -0.917   | -0.815     |
| OH                            | -0.338  | 0.292    | -0.031 | 0.116  | -0.208     | 0.214     | 0.566  | -0.122 | -0.086 | 0.548     | 0.759    | 0.730    | -0.208     |
| H <sub>2</sub> O <sub>2</sub> | -0.636  | -0.048   | -0.366 | 0.444  | 0.134      | -0.127    | 0.255  | -0.449 | -0.417 | 0.798     | 0.495    | 0.918    | 0.134      |
| ABTS                          | 0.686   | 0.985    | 0.877  | -0.833 | -0.966     | 0.968     | 0.991  | 0.830  | 0.850  | -0.498    | 0.924    | -0.279   | -0.966     |
| <b>V6-B</b>                   | Max.T   | Min.T    | MT     | Rf     | RH         | SP        | D      | MWs    | MnWs   | pH        | EC       | Om       | Alt.       |
| TPC                           | 0.735   | 0.183    | 0.490  | -0.562 | -0.268     | 0.262     | -0.120 | 0.567  | 0.537  | -0.873    | -0.372   | -0.963   | -0.268     |
| TFC                           | 0.592   | -0.008   | 0.314  | -0.394 | -0.079     | 0.072     | -0.308 | 0.399  | 0.366  | -0.764    | -0.542   | -0.894   | -0.079     |
| FRAP                          | 0.396   | -0.232   | 0.093  | -0.178 | 0.146      | -0.153    | -0.513 | 0.183  | 0.148  | -0.599    | -0.717   | -0.771   | 0.146      |
| PMA                           | 0.930   | 0.525    | 0.771  | -0.823 | -0.597     | 0.592     | 0.245  | 0.826  | 0.805  | -0.990    | -0.013   | -0.995   | -0.597     |
| DPPH                          | 0.265   | -0.365   | -0.046 | -0.039 | 0.282      | -0.289    | -0.628 | 0.045  | 0.009  | -0.482    | -0.807   | -0.675   | 0.282      |
| OH                            | 0.720   | 0.992    | 0.899  | -0.859 | -0.978     | 0.979     | 0.984  | 0.856  | 0.874  | -0.539    | 0.905    | -0.325   | -0.978     |
| H <sub>2</sub> O <sub>2</sub> | -0.968  | -0.625   | -0.843 | 0.886  | 0.691      | -0.686    | -0.362 | -0.888 | -0.871 | 1.000(*)  | -0.110   | 0.976    | 0.691      |

|                               |           |            |          |           |        |        |          |           |            |        |          |          |        |
|-------------------------------|-----------|------------|----------|-----------|--------|--------|----------|-----------|------------|--------|----------|----------|--------|
| ABTS                          | 0.786     | 1.000(*)   | 0.938    | -0.905    | -0.994 | 0.994  | 0.961    | 0.903     | 0.918      | -0.620 | 0.858    | -0.417   | -0.994 |
| <b>V7-B</b>                   | Max.T     | Min.T      | MT       | Rf        | RH     | SP     | D        | MWs       | MnWs       | pH     | EC       | Om       | Alt.   |
| TPC                           | -0.409    | 0.219      | -0.107   | 0.191     | -0.133 | 0.140  | 0.502    | -0.197    | -0.162     | 0.610  | 0.707    | 0.780    | -0.133 |
| TFC                           | 0.716     | 0.157      | 0.466    | -0.540    | -0.242 | 0.235  | -0.147   | 0.544     | 0.514      | -0.859 | -0.397   | -0.956   | -0.242 |
| FRAP                          | -0.695    | -0.126     | -0.438   | 0.514     | 0.212  | -0.205 | 0.178    | -0.518    | -0.487     | 0.843  | 0.425    | 0.946    | 0.212  |
| PMA                           | 0.206     | 0.750      | 0.498    | -0.422    | -0.690 | 0.695  | 0.914    | 0.417     | 0.449      | 0.028  | 0.988    | 0.263    | -0.690 |
| DPPH                          | -0.725    | -0.169     | -0.477   | 0.550     | 0.254  | -0.247 | 0.135    | -0.555    | -0.525     | 0.865  | 0.386    | 0.959    | 0.254  |
| OH                            | -1.000(*) | -0.790     | -0.945   | 0.970     | 0.840  | -0.836 | -0.569   | -0.971    | -0.962     | 0.977  | -0.338   | 0.899    | 0.840  |
| H <sub>2</sub> O <sub>2</sub> | 0.980     | 0.904      | 0.994    | -1.000(*) | -0.938 | 0.936  | 0.734    | 1.000(*)  | .998(*)    | -0.907 | 0.535    | -0.782   | -0.938 |
| ABTS                          | -0.011    | 0.590      | 0.299    | -0.216    | -0.517 | 0.523  | 0.805    | 0.211     | 0.245      | 0.243  | 0.931    | 0.465    | -0.517 |
| <b>V8-B</b>                   | Max.T     | Min.T      | MT       | Rf        | RH     | SP     | D        | MWs       | MnWs       | pH     | EC       | Om       | Alt.   |
| TPC                           | -0.635    | -0.971     | -0.842   | 0.793     | 0.946  | -0.949 | -.998(*) | -0.790    | -0.811     | 0.437  | -0.948   | 0.213    | 0.946  |
| TFC                           | 0.410     | 0.874      | 0.672    | -0.606    | -0.829 | 0.832  | 0.980    | 0.601     | 0.630      | -0.186 | .998(*)  | 0.051    | -0.828 |
| FRAP                          | -0.196    | 0.430      | 0.117    | -0.031    | -0.349 | 0.356  | 0.681    | 0.026     | 0.061      | 0.419  | 0.847    | 0.621    | -0.349 |
| PMA                           | -0.797    | -1.000(**) | -0.945   | 0.913     | 0.996  | -0.996 | -0.956   | -0.911    | -0.925     | 0.634  | -0.848   | 0.434    | 0.996  |
| DPPH                          | -0.935    | -0.961     | -.999(*) | 0.991     | 0.981  | -0.980 | -0.834   | -0.990    | -0.995     | 0.827  | -0.663   | 0.671    | 0.981  |
| OH                            | -0.970    | -0.922     | -.998(*) | 1.000(*)  | 0.953  | -0.950 | -0.764   | -1.000(*) | -1.000(**) | 0.887  | -0.572   | 0.753    | 0.953  |
| H <sub>2</sub> O <sub>2</sub> | -0.989    | -0.705     | -0.896   | 0.930     | 0.764  | -0.760 | -0.460   | -0.932    | -0.919     | 0.996  | -0.216   | 0.947    | 0.764  |
| ABTS                          | 0.330     | 0.829      | 0.606    | -0.536    | -0.778 | 0.782  | 0.959    | 0.531     | 0.561      | -0.101 | 1.000(*) | 0.136    | -0.778 |
| <b>V9-B</b>                   | Max.T     | Min.T      | MT       | Rf        | RH     | SP     | D        | MWs       | MnWs       | pH     | EC       | Om       | Alt.   |
| TPC                           | 0.296     | -0.335     | -0.014   | -0.072    | 0.251  | -0.258 | -0.602   | 0.077     | 0.041      | -0.510 | -0.788   | -0.699   | 0.251  |
| TFC                           | 0.117     | 0.688      | 0.419    | -0.339    | -0.623 | 0.628  | 0.874    | 0.334     | 0.368      | 0.117  | 0.970    | 0.348    | -0.623 |
| FRAP                          | 0.296     | -0.334     | -0.014   | -0.072    | 0.251  | -0.258 | -0.602   | 0.077     | 0.042      | -0.510 | -0.787   | -0.699   | 0.251  |
| PMA                           | 0.858     | 0.379      | 0.657    | -0.719    | -0.458 | 0.452  | 0.084    | 0.723     | 0.697      | -0.954 | -0.176   | -.998(*) | -0.459 |
| DPPH                          | 0.074     | -0.537     | -0.237   | 0.153     | 0.462  | -0.468 | -0.766   | -0.148    | -0.183     | -0.305 | -0.905   | -0.521   | 0.462  |
| OH                            | -0.916    | -0.974     | -0.995   | 0.983     | 0.990  | -0.989 | -0.861   | -0.982    | -0.988     | 0.797  | -0.701   | 0.632    | 0.990  |
| H <sub>2</sub> O <sub>2</sub> | 0.083     | -0.530     | -0.229   | 0.145     | 0.454  | -0.460 | -0.760   | -0.140    | -0.175     | -0.313 | -0.902   | -0.528   | 0.454  |

---

|      |        |        |        |       |       |        |        |        |        |       |          |        |       |
|------|--------|--------|--------|-------|-------|--------|--------|--------|--------|-------|----------|--------|-------|
| ABTS | -0.386 | -0.861 | -0.652 | 0.585 | 0.814 | -0.818 | -0.974 | -0.580 | -0.609 | 0.160 | -.999(*) | -0.077 | 0.814 |
|------|--------|--------|--------|-------|-------|--------|--------|--------|--------|-------|----------|--------|-------|

---

**Table S2.** Correlations of total phenolic, flavonoid contents, and antioxidant activities in onion leaves with growing conditions

| <b>V1-L</b>                   | Max.T     | Min.T  | MT        | Rf      | RH      | SP       | D      | MWs      | MnWs   | pH        | EC      | Om     | Alt.    |
|-------------------------------|-----------|--------|-----------|---------|---------|----------|--------|----------|--------|-----------|---------|--------|---------|
| TPC                           | 0.061     | -0.549 | -0.251    | 0.167   | 0.474   | -0.480   | -0.774 | -0.162   | -0.197 | -0.296    | -0.911  | -0.442 | 0.474   |
| TFC                           | 0.497     | 0.917  | 0.741     | -0.680  | -0.879  | 0.882    | 0.995  | 0.677    | 0.702  | -0.276    | 0.988   | -0.123 | -0.879  |
| FRAP                          | -0.942    | -0.956 | -1.000(*) | 0.994   | 0.978   | -0.976   | -0.823 | -0.993   | -0.997 | 0.835     | -0.649  | 0.739  | 0.978   |
| PMA                           | -0.993    | -0.868 | -0.981    | 0.994   | 0.908   | -0.905   | -0.679 | -0.995   | -0.991 | 0.935     | -0.466  | 0.869  | 0.908   |
| DPPH                          | -1.000(*) | -0.789 | -0.945    | 0.969   | 0.839   | -0.836   | -0.568 | -0.970   | -0.961 | 0.976     | -0.337  | 0.930  | 0.839   |
| OH                            | 0.906     | 0.979  | 0.992     | -0.978  | -0.993  | 0.992    | 0.873  | 0.977    | 0.984  | -0.779    | 0.718   | -0.672 | -0.993  |
| H <sub>2</sub> O <sub>2</sub> | -0.886    | -0.432 | -0.699    | 0.758   | 0.509   | -0.503   | -0.141 | -0.761   | -0.737 | 0.971     | 0.119   | 0.996  | 0.509   |
| ABTS                          | 0.288     | 0.804  | 0.570     | -0.498  | -0.749  | 0.754    | 0.945  | 0.493    | 0.524  | -0.053    | .997(*) | 0.104  | -0.749  |
| <b>V2-L</b>                   | Max.T     | Min.T  | MT        | Rf      | RH      | SP       | D      | MWs      | MnWs   | pH        | EC      | Om     | Alt.    |
| TPC                           | -0.253    | -0.782 | -0.54     | 0.466   | 0.725   | -0.729   | -0.933 | -0.461   | -0.492 | 0.016     | -0.994  | -0.140 | 0.725   |
| TFC                           | 0.732     | 0.994  | 0.907     | -0.868  | -0.981  | 0.982    | 0.981  | 0.865    | 0.882  | -0.549    | 0.897   | -0.412 | -0.981  |
| FRAP                          | -0.985    | -0.892 | -0.990    | .998(*) | 0.928   | -0.925   | -0.715 | -.999(*) | -0.996 | 0.916     | -0.511  | 0.842  | 0.928   |
| PMA                           | -0.815    | -0.306 | -0.596    | 0.663   | 0.388   | -0.382   | -0.006 | -0.666   | -0.640 | 0.929     | 0.252   | 0.976  | 0.388   |
| DPPH                          | -0.882    | -0.989 | -0.985    | 0.966   | .998(*) | -.997(*) | -0.898 | -0.965   | -0.973 | 0.745     | -0.754  | 0.632  | .998(*) |
| OH                            | -0.997    | -0.847 | -0.973    | 0.989   | 0.890   | -0.887   | -0.648 | -0.99    | -0.984 | 0.949     | -0.43   | 0.888  | 0.89    |
| H <sub>2</sub> O <sub>2</sub> | -0.254    | 0.376  | 0.058     | 0.028   | -0.294  | 0.300    | 0.637  | -0.033   | 0.002  | 0.476     | 0.814   | 0.608  | -0.294  |
| ABTS                          | 0.307     | 0.816  | 0.586     | -0.515  | -0.762  | 0.767    | 0.952  | 0.51     | 0.541  | -0.072    | .999(*) | 0.084  | -0.762  |
| <b>V3-L</b>                   | Max.T     | Min.T  | MT        | Rf      | RH      | SP       | D      | MWs      | MnWs   | pH        | EC      | Om     | Alt.    |
| TPC                           | 0.636     | 0.048  | 0.367     | -0.445  | -0.135  | 0.128    | -0.254 | 0.450    | 0.418  | -0.801    | -0.495  | -0.885 | -0.135  |
| TFC                           | 0.657     | 0.977  | 0.858     | -0.811  | -0.955  | 0.957    | 0.996  | 0.808    | 0.828  | -0.459    | 0.938   | -0.315 | -0.955  |
| FRAP                          | -0.994    | -0.734 | -0.913    | 0.945   | 0.790   | -0.786   | -0.496 | -0.947   | -0.934 | 0.991     | -0.256  | 0.958  | 0.790   |
| PMA                           | -0.804    | -0.289 | -0.581    | 0.649   | 0.371   | -0.365   | 0.012  | -0.653   | -0.625 | 0.922     | 0.269   | 0.971  | 0.371   |
| DPPH                          | -0.706    | -0.989 | -0.890    | 0.848   | 0.973   | -0.974   | -0.987 | -0.845   | -0.863 | 0.517     | -0.913  | 0.377  | 0.973   |
| OH                            | -0.983    | -0.677 | -0.877    | 0.915   | 0.738   | -0.734   | -0.424 | -0.917   | -0.903 | .999(*)   | -0.177  | 0.978  | 0.738   |
| H <sub>2</sub> O <sub>2</sub> | -0.972    | -0.638 | -0.852    | 0.894   | 0.703   | -0.698   | -0.378 | -0.896   | -0.880 | 1.000(**) | -0.126  | 0.987  | 0.703   |

|                               |            |         |          |           |          |         |          |           |            |           |           |        |          |
|-------------------------------|------------|---------|----------|-----------|----------|---------|----------|-----------|------------|-----------|-----------|--------|----------|
| ABTS                          | 0.151      | 0.713   | 0.450    | -0.371    | -0.649   | 0.654   | 0.891    | 0.367     | 0.399      | 0.088     | 0.978     | 0.242  | -0.649   |
| <b>V4-L</b>                   | Max.T      | Min.T   | MT       | Rf        | RH       | SP      | D        | MWs       | MnWs       | pH        | EC        | Om     | Alt.     |
| TPC                           | .999(*)    | 0.832   | 0.966    | -0.985    | -0.877   | 0.874   | 0.627    | 0.986     | 0.979      | -0.957    | 0.405     | -0.900 | -0.877   |
| TFC                           | 0.139      | 0.704   | 0.438    | -0.359    | -0.639   | 0.644   | 0.885    | 0.354     | 0.387      | 0.101     | 0.975     | 0.255  | -0.639   |
| FRAP                          | -0.968     | -0.624  | -0.842   | 0.885     | 0.690    | -0.685  | -0.360   | -0.888    | -0.871     | 1.000(**) | -0.108    | 0.990  | 0.690    |
| PMA                           | -0.459     | 0.164   | -0.162   | 0.246     | -0.077   | 0.084   | 0.453    | -0.251    | -0.216     | 0.657     | 0.667     | 0.767  | -0.077   |
| DPPH                          | -.999(*)   | -0.832  | -0.966   | 0.985     | 0.878    | -0.874  | -0.628   | -0.986    | -0.979     | 0.957     | -0.406    | 0.900  | 0.878    |
| OH                            | 0.11       | 0.683   | 0.412    | -0.332    | -0.616   | 0.622   | 0.871    | 0.327     | 0.36       | 0.130     | 0.968     | 0.283  | -0.616   |
| H <sub>2</sub> O <sub>2</sub> | -0.636     | -0.048  | -0.366   | 0.444     | 0.134    | -0.127  | 0.255    | -0.449    | -0.417     | 0.801     | 0.495     | 0.885  | 0.134    |
| ABTS                          | 0.237      | 0.771   | 0.525    | -0.451    | -0.713   | 0.717   | 0.927    | 0.446     | 0.477      | 0.001     | 0.992     | 0.157  | -0.713   |
| <b>V5-L</b>                   | Max.T      | Min.T   | MT       | Rf        | RH       | SP      | D        | MWs       | MnWs       | pH        | EC        | Om     | Alt.     |
| TPC                           | -0.110     | 0.507   | 0.203    | -0.118    | -0.430   | 0.436   | 0.742    | 0.113     | 0.148      | 0.343     | 0.890     | 0.485  | -0.430   |
| TFC                           | 0.240      | 0.773   | 0.528    | -0.454    | -0.715   | 0.720   | 0.928    | 0.449     | 0.481      | -0.003    | 0.993     | 0.153  | -0.715   |
| FRAP                          | -0.965     | -0.930  | -.999(*) | .999(*)   | 0.958    | -0.956  | -0.776   | -.999(*)  | -1.000(**) | 0.876     | -0.587    | 0.790  | 0.958    |
| PMA                           | -0.970     | -0.922  | -.997(*) | 1.000(**) | 0.952    | -0.950  | -0.763   | -1.000(*) | -1.000(**) | 0.885     | -0.571    | 0.802  | 0.952    |
| DPPH                          | -0.733     | -0.994  | -0.907   | 0.868     | 0.981    | -0.983  | -0.980   | -0.865    | -0.883     | 0.550     | -0.897    | 0.413  | 0.981    |
| OH                            | -0.512     | 0.104   | -0.221   | 0.304     | -0.017   | 0.024   | 0.398    | -0.309    | -0.275     | 0.701     | 0.621     | 0.804  | -0.017   |
| H <sub>2</sub> O <sub>2</sub> | -0.352     | 0.278   | -0.046   | 0.131     | -0.193   | 0.200   | 0.553    | -0.136    | -0.101     | 0.565     | 0.749     | 0.687  | -0.193   |
| ABTS                          | 0.096      | 0.672   | 0.399    | -0.319    | -0.605   | 0.611   | 0.864    | 0.314     | 0.347      | 0.143     | 0.964     | 0.296  | -0.605   |
| <b>V6-L</b>                   | Max.T      | Min.T   | MT       | Rf        | RH       | SP      | D        | MWs       | MnWs       | pH        | EC        | Om     | Alt.     |
| TPC                           | -0.625     | -0.968  | -0.836   | 0.786     | 0.942    | -0.945  | -.999(*) | -0.783    | -0.804     | 0.422     | -0.952    | 0.275  | 0.942    |
| TFC                           | 0.364      | 0.849   | 0.634    | -0.566    | -0.800   | 0.804   | 0.969    | 0.561     | 0.590      | -0.132    | 1.000(**) | 0.024  | -0.800   |
| FRAP                          | -1.000(**) | -0.801  | -0.951   | 0.974     | 0.850    | -0.846  | -0.584   | -0.975    | -0.967     | 0.972     | -0.355    | 0.923  | 0.850    |
| PMA                           | 0.088      | 0.667   | 0.392    | -0.312    | -0.599   | 0.605   | 0.860    | 0.307     | 0.340      | 0.151     | 0.962     | 0.303  | -0.599   |
| DPPH                          | -0.627     | -0.037  | -0.356   | 0.434     | 0.123    | -0.117  | 0.265    | -0.439    | -0.407     | 0.794     | 0.505     | 0.879  | 0.123    |
| OH                            | 0.829      | .999(*) | 0.961    | -0.934    | -.999(*) | .999(*) | 0.938    | 0.932     | 0.945      | -0.672    | 0.818     | -0.549 | -.999(*) |
| H <sub>2</sub> O <sub>2</sub> | 0.913      | 0.975   | 0.995    | -0.982    | -0.991   | 0.990   | 0.864    | 0.981     | 0.987      | -0.791    | 0.705     | -0.685 | -0.991   |

|                               |          |           |        |          |           |          |        |         |        |           |           |           |           |
|-------------------------------|----------|-----------|--------|----------|-----------|----------|--------|---------|--------|-----------|-----------|-----------|-----------|
| ABTS                          | 0.323    | 0.825     | 0.600  | -0.529   | -0.773    | 0.777    | 0.957  | 0.525   | 0.554  | -0.089    | .999(*)   | 0.068     | -0.773    |
| <b>V7-L</b>                   | Max.T    | Min.T     | MT     | Rf       | RH        | SP       | D      | MWs     | MnWs   | pH        | EC        | Om        | Alt.      |
| TPC                           | 0.423    | 0.881     | 0.682  | -0.617   | -0.837    | 0.840    | 0.982  | 0.613   | 0.641  | -0.196    | .997(*)   | -0.040    | -0.837    |
| TFC                           | -0.127   | 0.492     | 0.186  | -0.101   | -0.414    | 0.420    | 0.731  | 0.096   | 0.131  | 0.359     | 0.882     | 0.500     | -0.414    |
| FRAP                          | -0.500   | -0.919    | -0.743 | 0.683    | 0.881     | -0.884   | -0.995 | -0.679  | -0.705 | 0.280     | -0.987    | 0.127     | 0.881     |
| PMA                           | 0.986    | 0.891     | 0.990  | -.998(*) | -0.927    | 0.925    | 0.714  | .999(*) | 0.996  | -0.917    | 0.509     | -0.844    | -0.927    |
| DPPH                          | -0.317   | 0.314     | -0.008 | 0.093    | -0.230    | 0.237    | 0.585  | -0.099  | -0.063 | 0.533     | 0.774     | 0.658     | -0.230    |
| OH                            | -0.917   | -0.497    | -0.750 | 0.803    | 0.571     | -0.565   | -0.213 | -0.807  | -0.785 | 0.986     | 0.045     | 1.000(**) | 0.571     |
| H <sub>2</sub> O <sub>2</sub> | -0.986   | -0.691    | -0.887 | 0.923    | 0.751     | -0.747   | -0.442 | -0.925  | -0.911 | .997(*)   | -0.196    | 0.974     | 0.751     |
| ABTS                          | 0.754    | .997(*)   | 0.920  | -0.883   | -0.987    | 0.988    | 0.974  | 0.881   | 0.897  | -0.577    | 0.882     | -0.442    | -0.987    |
| <b>V8-L</b>                   | Max.T    | Min.T     | MT     | Rf       | RH        | SP       | D      | MWs     | MnWs   | pH        | EC        | Om        | Alt.      |
| TPC                           | -0.975   | -0.647    | -0.858 | 0.899    | 0.711     | -0.707   | -0.389 | -0.901  | -0.885 | 1.000(**) | -0.138    | 0.985     | 0.711     |
| TFC                           | 0.834    | .998(*)   | 0.964  | -0.937   | -1.000(*) | 1.000(*) | 0.935  | 0.936   | 0.948  | -0.679    | 0.812     | -0.556    | -1.000(*) |
| FRAP                          | -0.026   | 0.577     | 0.284  | -0.201   | -0.504    | 0.510    | 0.796  | 0.196   | 0.230  | 0.263     | 0.925     | 0.411     | -0.504    |
| PMA                           | 0.090    | 0.668     | 0.393  | -0.313   | -0.600    | 0.606    | 0.860  | 0.308   | 0.342  | 0.150     | 0.963     | 0.302     | -0.600    |
| DPPH                          | 0.352    | 0.842     | 0.624  | -0.555   | -0.792    | 0.796    | 0.965  | 0.550   | 0.580  | -0.119    | 1.000(**) | 0.037     | -0.792    |
| OH                            | -0.707   | -0.990    | -0.891 | 0.849    | 0.973     | -0.975   | -0.987 | -0.846  | -0.865 | 0.519     | -0.912    | 0.379     | 0.973     |
| H <sub>2</sub> O <sub>2</sub> | -0.908   | -0.477    | -0.735 | 0.790    | 0.552     | -0.546   | -0.192 | -0.793  | -0.771 | 0.982     | 0.068     | .999(*)   | 0.552     |
| ABTS                          | 0.210    | 0.754     | 0.502  | -0.426   | -0.693    | 0.698    | 0.916  | 0.422   | 0.454  | 0.028     | 0.989     | 0.184     | -0.693    |
| <b>V9-L</b>                   | Max.T    | Min.T     | MT     | Rf       | RH        | SP       | D      | MWs     | MnWs   | pH        | EC        | Om        | Alt.      |
| TPC                           | -.999(*) | -0.770    | -0.934 | 0.961    | 0.823     | -0.819   | -0.543 | -0.963  | -0.953 | 0.982     | -0.308    | 0.941     | 0.823     |
| TFC                           | 0.794    | 1.000(**) | 0.943  | -0.911   | -0.995    | 0.996    | 0.957  | 0.909   | 0.923  | -0.627    | 0.851     | -0.498    | -0.995    |
| FRAP                          | -0.437   | 0.188     | -0.137 | 0.222    | -0.102    | 0.109    | 0.474  | -0.227  | -0.192 | 0.638     | 0.685     | 0.751     | -0.102    |
| PMA                           | 0.280    | 0.799     | 0.563  | -0.490   | -0.743    | 0.748    | 0.943  | 0.486   | 0.516  | -0.044    | 0.997     | 0.113     | -0.743    |
| DPPH                          | -0.067   | 0.544     | 0.245  | -0.161   | -0.468    | 0.475    | 0.771  | 0.156   | 0.191  | 0.302     | 0.909     | 0.447     | -0.468    |
| OH                            | -0.399   | 0.229     | -0.096 | 0.181    | -0.144    | 0.150    | 0.511  | -0.186  | -0.151 | 0.605     | 0.715     | 0.722     | -0.144    |
| H <sub>2</sub> O <sub>2</sub> | -0.495   | -0.917    | -0.740 | 0.679    | 0.878     | -0.882   | -0.994 | -0.675  | -0.701 | 0.275     | -0.988    | 0.121     | 0.878     |

---

|      |       |       |       |        |        |       |       |       |       |        |       |       |        |
|------|-------|-------|-------|--------|--------|-------|-------|-------|-------|--------|-------|-------|--------|
| ABTS | 0.254 | 0.782 | 0.540 | -0.466 | -0.725 | 0.730 | 0.933 | 0.462 | 0.493 | -0.017 | 0.994 | 0.140 | -0.725 |
|------|-------|-------|-------|--------|--------|-------|-------|-------|-------|--------|-------|-------|--------|

---

Max.T. Mean maximum temperature, Min.T. Mean minimum temperature, MT. Mean temperature, Rf. Average rain fall, RH. Relative humidity, SP. Surface pressure, D. Dew/frost point, MWs. Maximum wind speed, MnWs. Minimum wind speed, EC. Electrical conductivity, Om. Organic matter, Alt. altitude. \*Correlation is significant at the 0.05 level (2-tailed),

\*\*Correlation is significant at the 0.01 level (2-tailed).



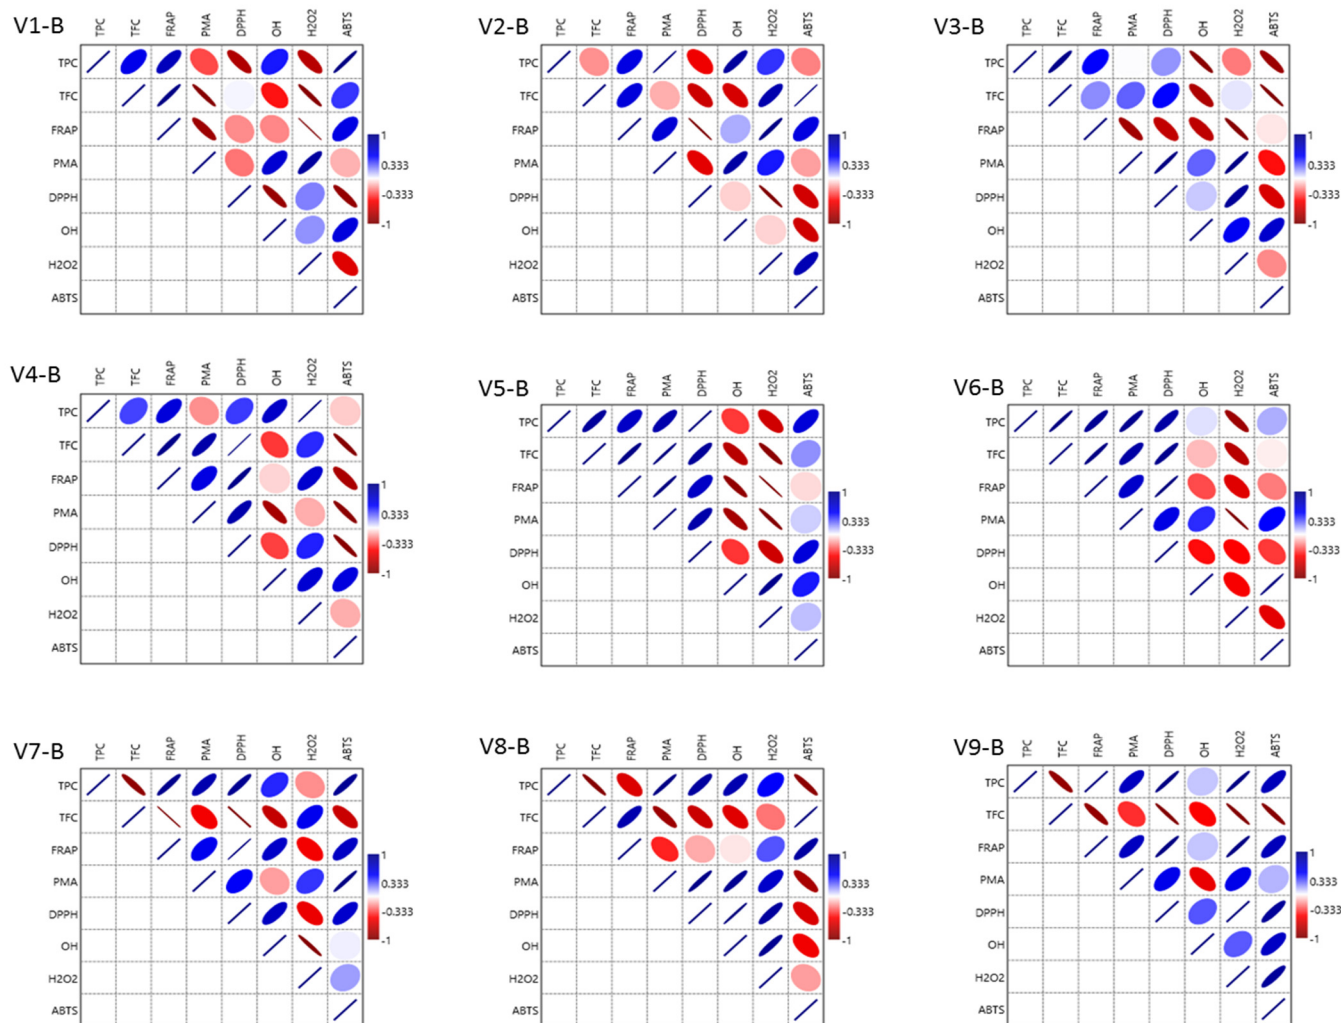

Figure S1. Correlation analysis between TPC, TFC and antioxidant activities in the bulbs of onion varieties

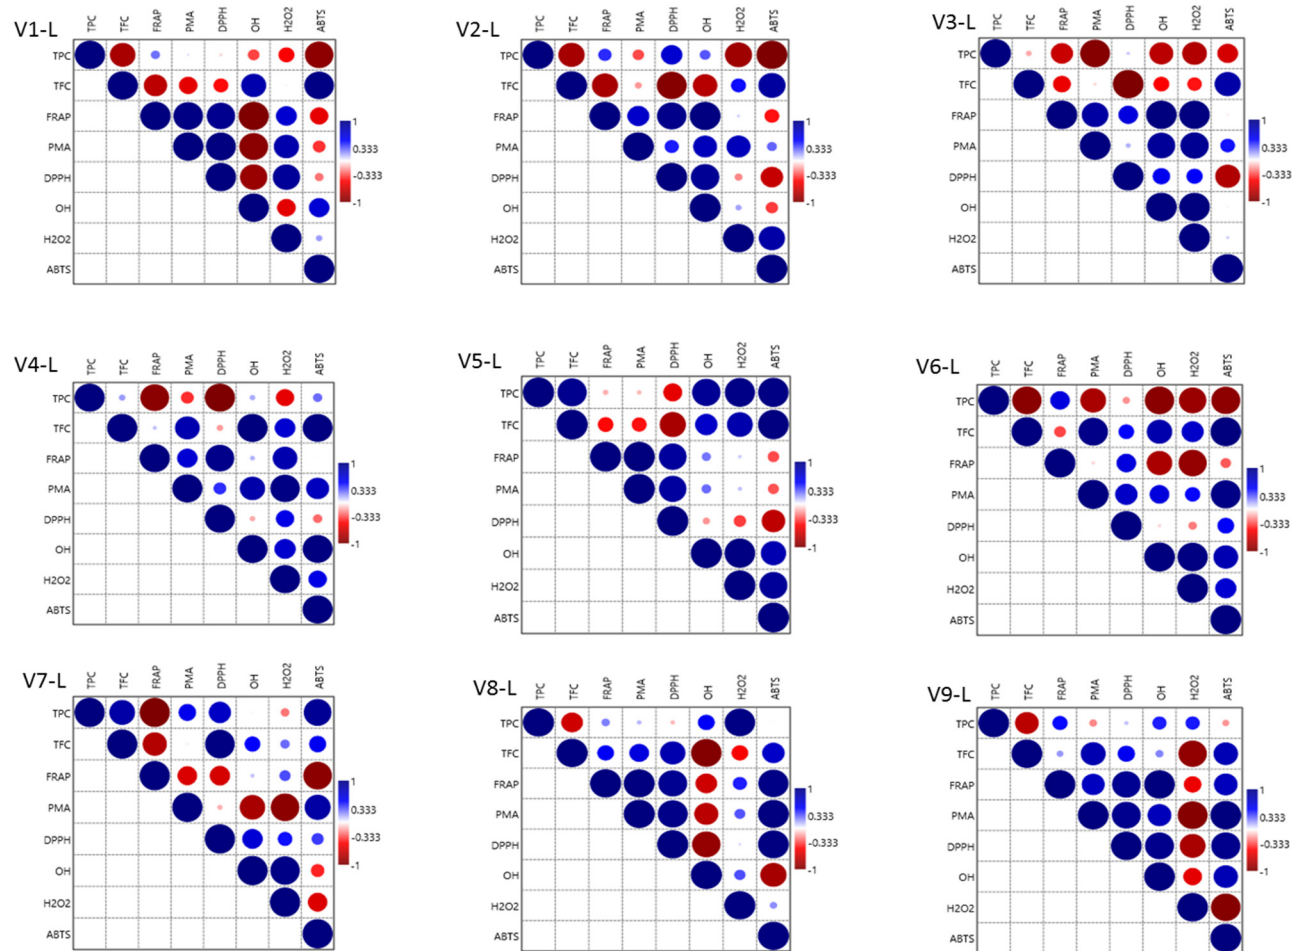

Figure S2. Correlation analysis between TPC, TFC and antioxidant activities in the leaves of onion varieties
